# Supplementary material
Source: PubMed Central journal article supplement (PMC5033809)
Supplement: jciinsight-1-87030-s001.pdf [file jciinsight-1-87030-s001.pdf]

# SUPPLEMENTARY MATERIAL

## Multiplexed immunofluorescence delineates proteomic cancer cell states associated with metabolism

**Authors:** Anup Sood<sup>7\*</sup>, Alexandra M. Miller<sup>2\*</sup>, Edi Brogi<sup>3\*</sup>, Yunxia Sui<sup>7</sup>, Joshua Armenia<sup>1</sup>, Elizabeth McDonough<sup>7</sup>, Alberto Santamaria-Pang<sup>7</sup>, Sean Carlin<sup>4</sup>, Aleksandra Stamper<sup>1</sup>, Carl Campos<sup>1</sup>, Zhengyu Pang<sup>7</sup>, Qing Li<sup>7</sup>, Elisa Port<sup>5,†</sup>, Tom Graeber<sup>8</sup>, Nikolaus Schultz<sup>1,6</sup>, Fiona Ginty<sup>7,#</sup>, Steven M. Larson<sup>4,#</sup>, and Ingo K. Mellinghoff<sup>1,2,9,#</sup>

**Affiliations:** <sup>1</sup> Human Oncology and Pathogenesis Program, and the Departments of <sup>2</sup>Neurology, <sup>3</sup>Pathology, <sup>4</sup>Radiology, <sup>5</sup>Surgery, and <sup>6</sup>Epidemiology and Biostatistics, Memorial Sloan-Kettering Cancer Center, New York, NY10065, USA; <sup>7</sup>Diagnostic Imaging and Biomedical Technologies, General Electric Global Research Center, Niskayuna, NY 12309; <sup>8</sup>Department of Molecular and Medical Pharmacology, University of California at Los Angeles, CA 90095; <sup>9</sup>Department of Pharmacology, Weill-Cornell Medical School, New York, NY10021, USA

\* Equal contribution. # To whom correspondence should be addressed: [ginty@research.ge.com](mailto:ginty@research.ge.com), [LarsonS@mskcc.org](mailto:LarsonS@mskcc.org), and [mellingi@mskcc.org](mailto:mellingi@mskcc.org); † Present Addresses: Department of Surgery, Mount Sinai Hospital, New York, NY10029

### **Index**

Supplementary Figures 1-9\_pages 2-11  
Supplementary Table 1\_page 12  
Supplementary Table 2\_page 13  
Supplementary Table 3\_page 14-16

## Supplementary Figure 1

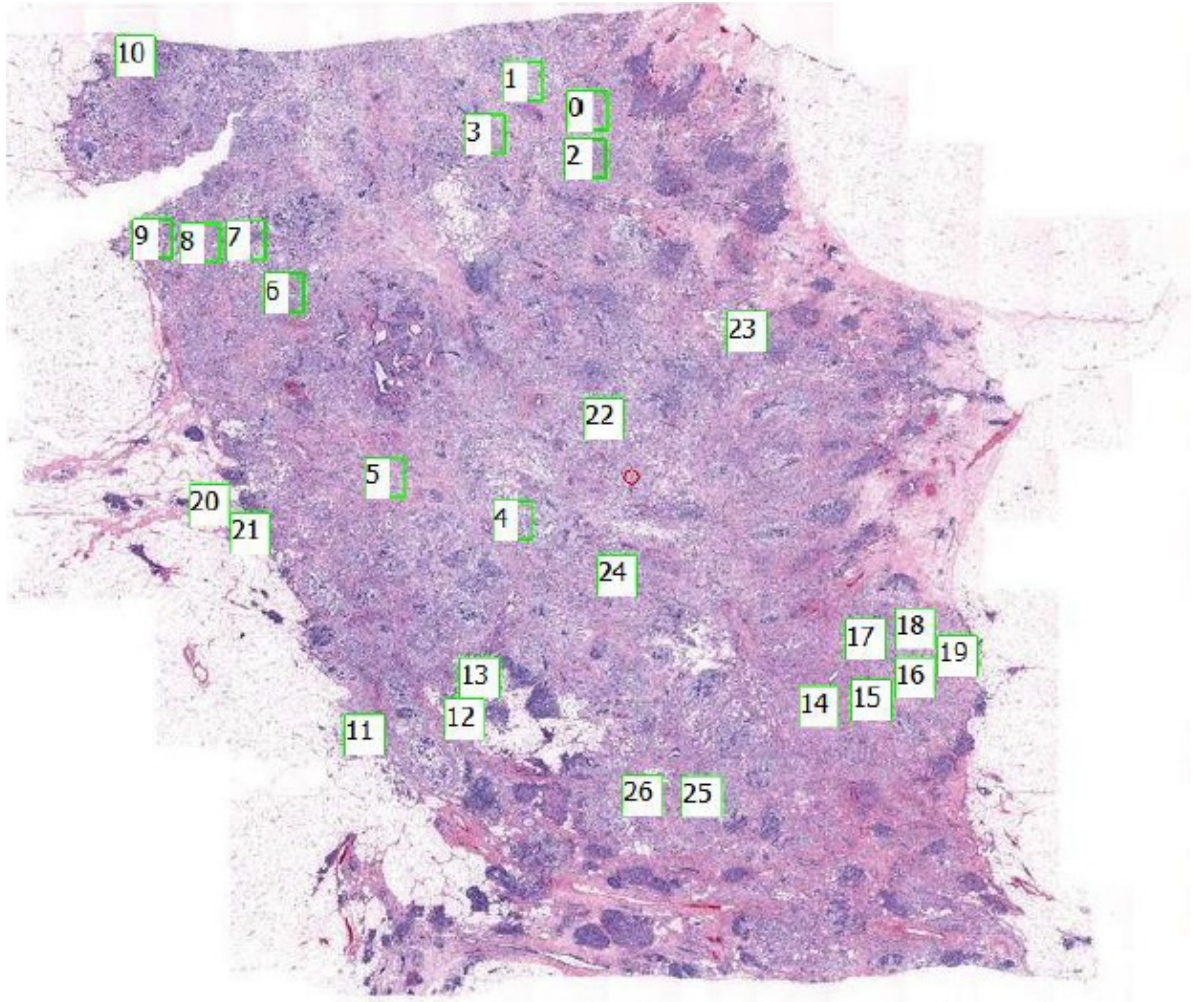

**Supplementary Figure 1. Placement of 10- 40 Fields-of-View (FOVs) per tumor specimen.** Shown is a virtual hematoxylin/eosin (H&E) image of one human breast cancer specimen (#068). Each green box indicates one FOV.

## Supplementary Figure 2

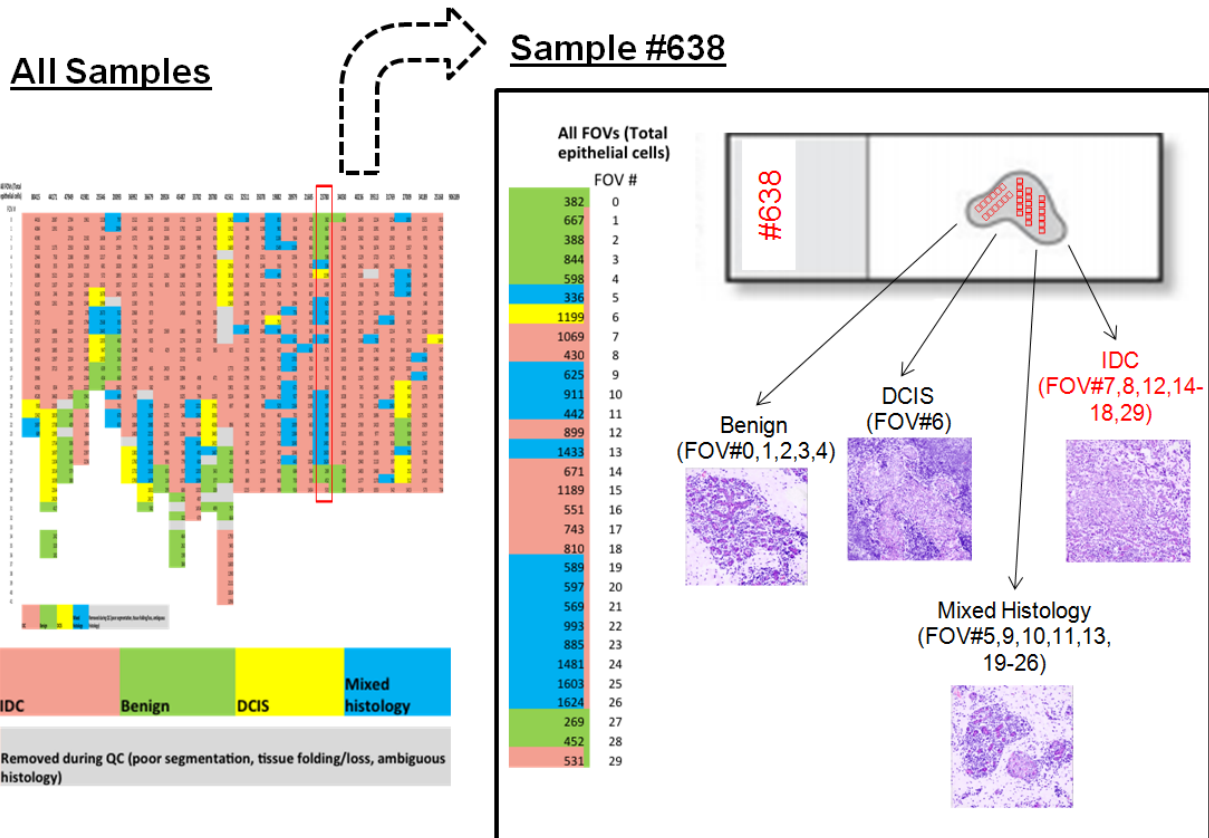

**Supplementary Figure 2. Pathological Annotation of all FOVs.** The left part of the figure shows an overview of the data presented in Supplementary Table 3 at higher resolution. Each column represents one tumor specimen, each row represents one FOV. For each tumor sample, exemplified by tumor #638 in the right part of the figure, 10-40 fields-of-view (FOVs) were placed, reviewed by a breast cancer pathologist (E.B.), and classified into one of four categories: IDC (red), benign tissue (green), ductal carcinoma-in-situ (DCIS, yellow), or mixed histology (blue). The right part of the figure shows the distribution of all FOVs amongst the four histopathological categories (Sample #638). In tumor #638, FOVs #0/1/2/3/4 contained mostly non-malignant epithelial cells (benign breast tissue), whereas FOVs #7, 8, 12, 14-18, and 29 consisted mostly of invasive ductal carcinoma cells. **Note**, the majority of FOVs in our dataset represented IDC (red cells in left part of figure). FOVs representing benign breast tissue (green), DCIS (yellow), or areas of mixed histology (blue) were excluded from the analysis of protein expression clusters. The numbers listed in each cell represent the number of epithelial cells in each FOV.

### Supplementary Figure 3

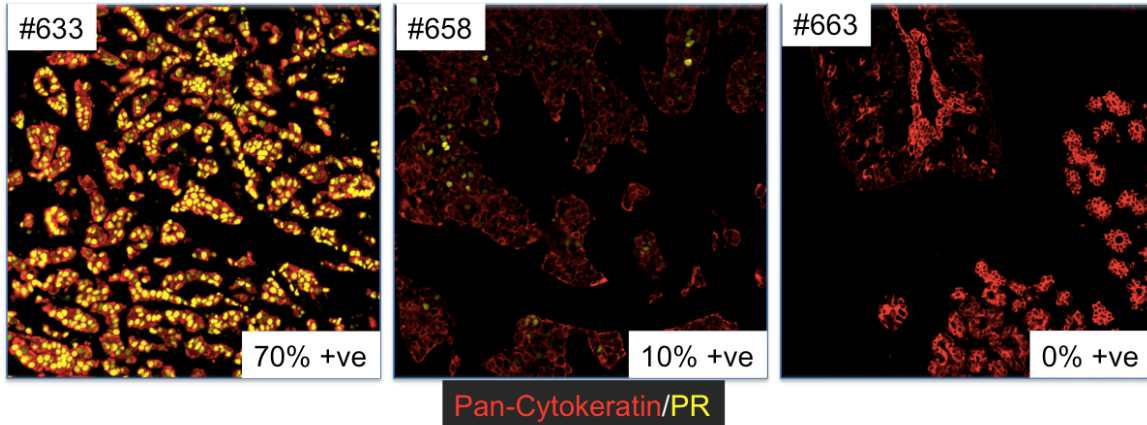

**Supplementary Figure 3. Progesterone Expression in three representative breast cancers (#633, #658, #663).** Pancytokeratin=red. PR=yellow. Sample #658 was one of the samples that was discordant between the CLIA result and the IF results. Magnification=20x.

### Supplementary Figure 4:

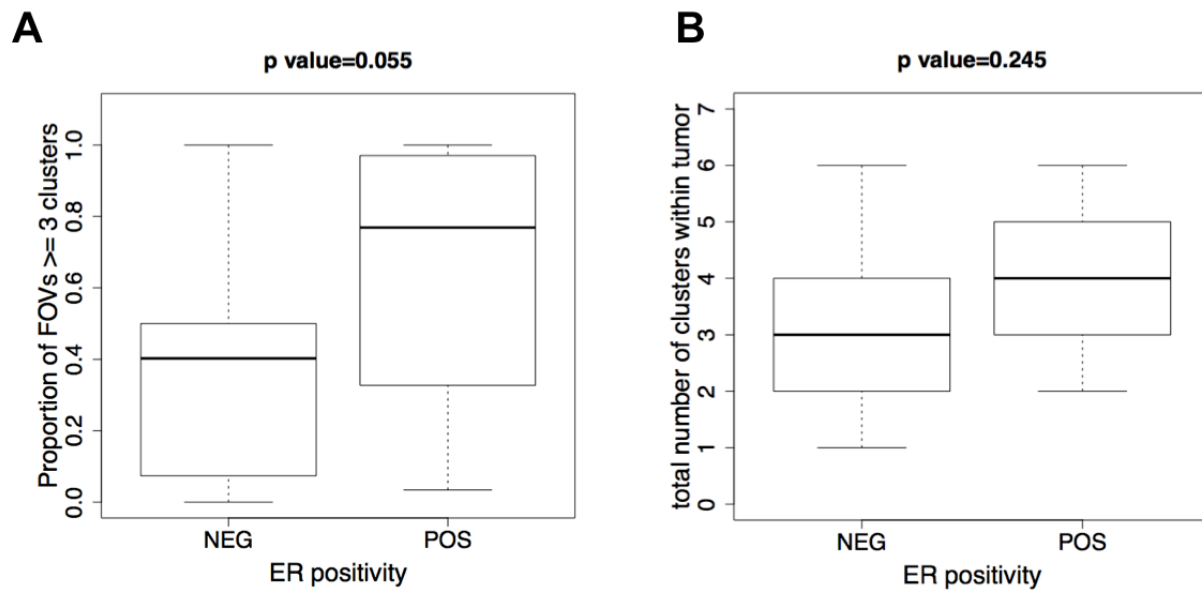

**Supplementary Figure 4. Relationship between ER status and heterogeneity in protein expression.** There was a trend toward higher intratumoral heterogeneity in ER-positive tumors, but this relationship was not significant when heterogeneity was defined as **A.)** the fraction of FOVs containing three of more different protein expression clusters ( $p=0.06$ , t-test) or **B.)** the number of clusters expressed in  $> 1\%$  of neoplastic cells ( $p=0.25$ , t-test).

Supplementary Figure 5:

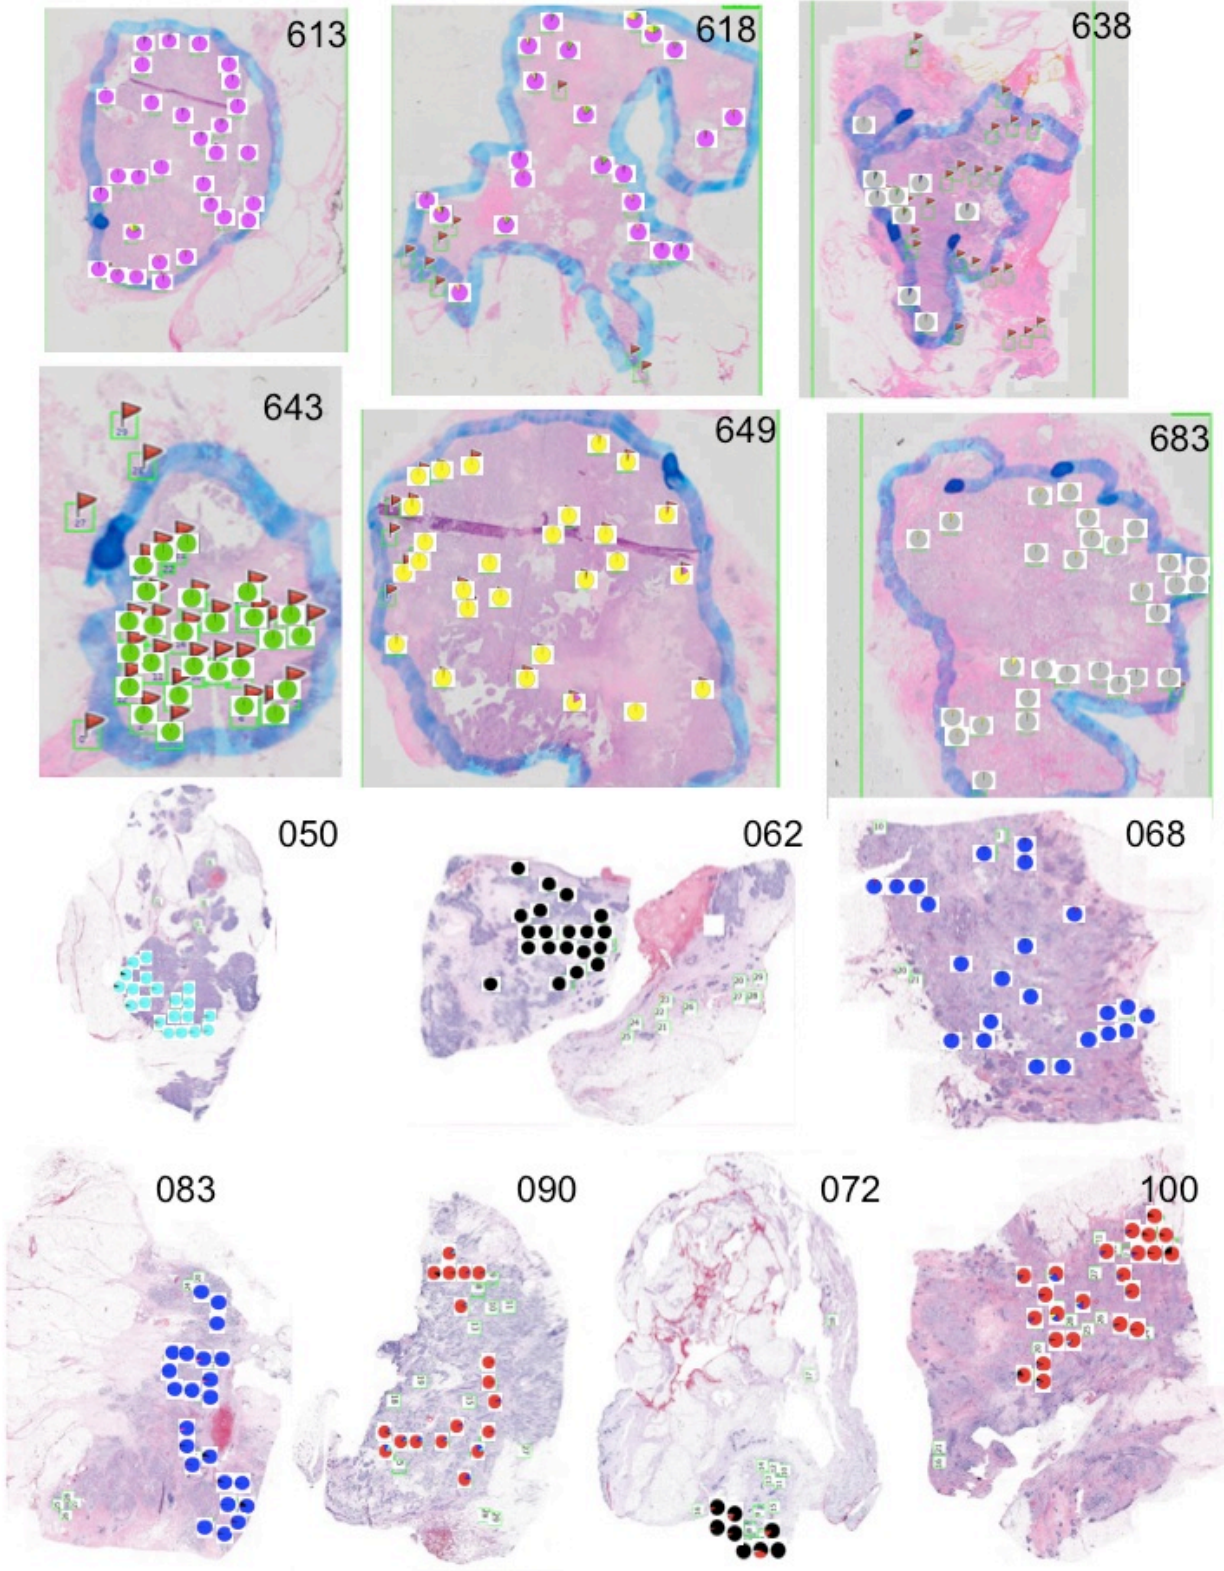

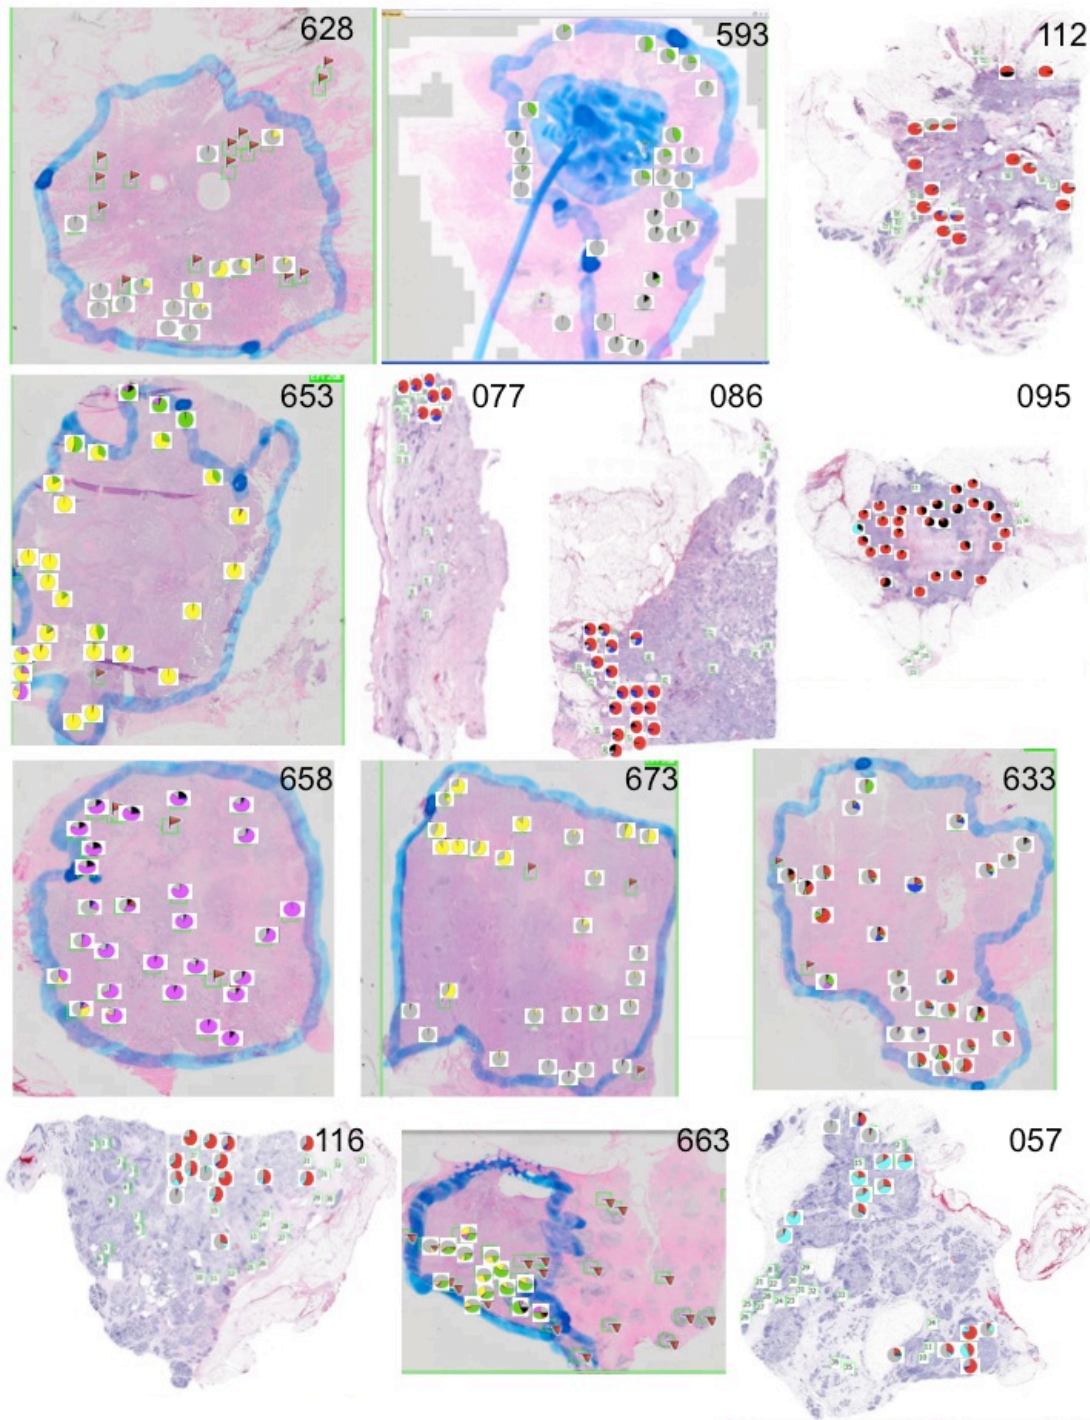

**Supplementary Figure 5. Spatial Distribution of Protein Expression Clusters.** Shown are low resolution images of each breast cancer specimen. Colored pie charts show the distribution of protein expression clusters within each FOV (cluster color identical to Figure 4 in main MS). Green boxes without pie charts represent FOVs that were not included in our quantitative analysis of protein expression because they included areas of mixed histology, ductal carcinoma-in-situ, or normal epithelial cells.

## Supplementary Figure 6

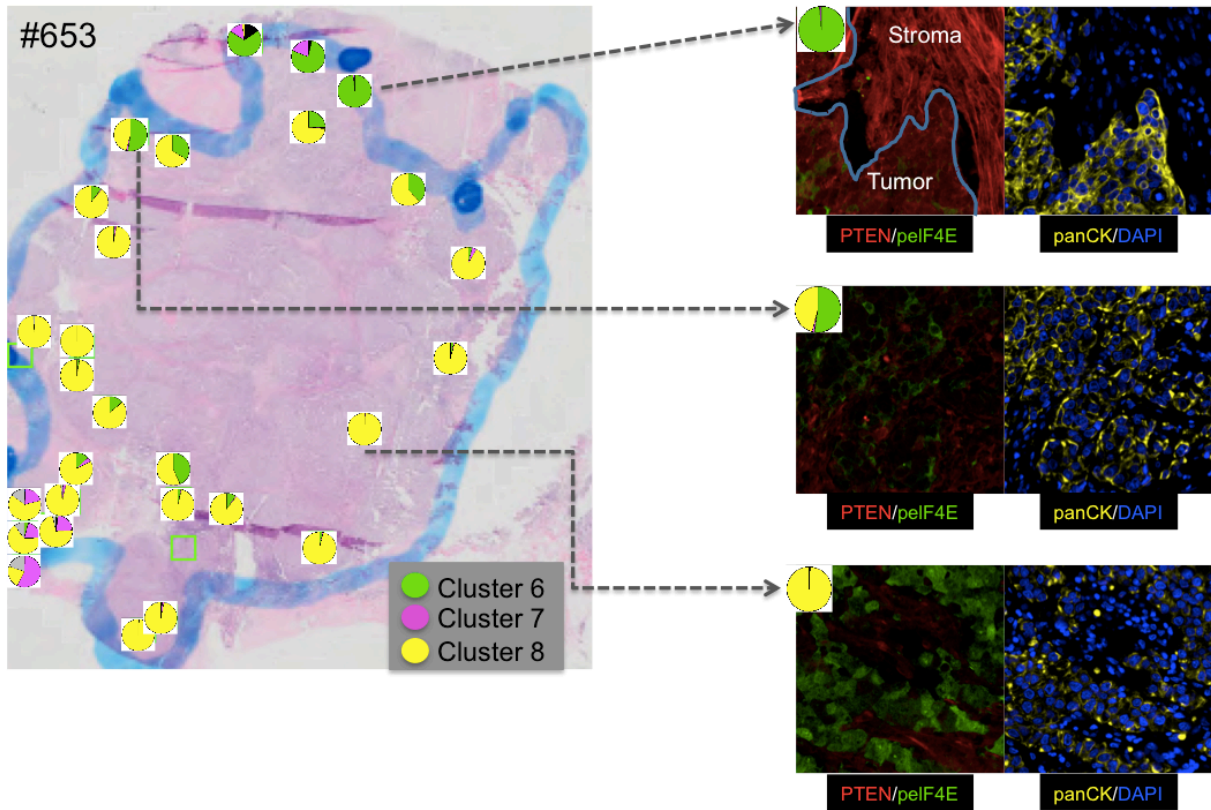

**Supplementary Figure 6: Regional Loss of PTEN expression in tumor # 653.** Left Panel: Low resolution view of the entire section of tumor #653. Colored pie charts show the distribution of protein expression clusters within each FOV. Note, that the upper portion of the tumor section 653 is characterized predominantly by cluster 6 cells. There is a transitional zone that is heterogeneous in which there is a mixture of cluster 6 and cluster 8 positive cells, then in the lower portion of the tumor, the cells mostly belong to cluster 8. Right Panel: Immunofluorescence staining for the indicated FOVs. PTEN (red) is strongly expressed in the upper region of the tumor (both stroma and tumor cells). In the lower region, PTEN expression is only noted in panCK (yellow)-negative stromal cells, but not panCK-positive tumor cells. Additionally, note increase staining for p-eIF4E (green) in PTEN negative tumor cells. DAPI=blue. Magnification=20x; Zoom=3x.



### Supplementary Figure 7:

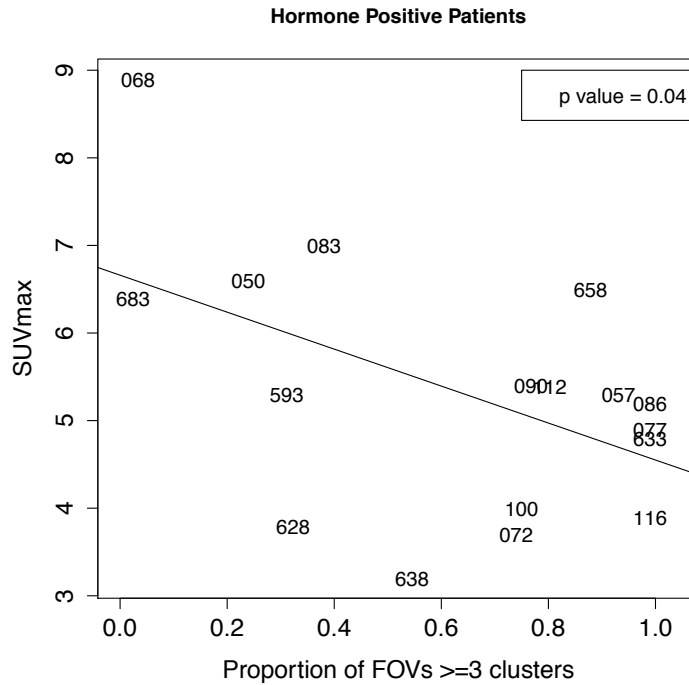

**Supplementary Figure 7: Relationship between intratumoral heterogeneity and FDG-uptake in ER positive tumors.** A linear regression model was used to compare intratumoral heterogeneity with SUVmax. Heterogeneity was defined as the fraction of FOVs containing three or more distinct protein expression clusters. The FOVs were binned into “homogenous” vs. “heterogeneous” using a cut-off of  $\geq 3$  clusters (the linear slope is -2.11 with  $p=0.04$  based on t-test).

## Supplementary Figure 8:

| <b>Univariate Analysis</b>               |                                |                |
|------------------------------------------|--------------------------------|----------------|
| <b>Predictor of FDG SUV max</b>          | <b>P-value</b>                 | <b>Slope</b>   |
| <i>Negatively correlated</i>             |                                |                |
| ER (mean)                                | 4.03E-06                       | -2.26          |
| PR (mean)                                | 2.37E-03                       | -1.29          |
| PTEN (mean)                              | 4.17E-02                       | -4.06          |
| <i>Positively Correlated</i>             |                                |                |
| Ki67 (mean)                              | 6.57E-03                       | 4.89           |
| N-myc downstream regulated 1 (std. dev.) | 1.62E-03                       | 6.71           |
| Glut1 (Mean)                             | 1.42E-02                       | 1.81           |
| <b>Multivariate Analysis</b>             |                                |                |
| <b>Predictor of FDG SUV max</b>          | <b>Regression co-efficient</b> | <b>p-Value</b> |
| <i>(Intercept)</i>                       | 12.67                          | 1.12E-04       |
| ER (mean)                                | -1.75                          | 6.38E-05       |
| PR (mean)                                | -0.36                          | 2.26E-01       |
| N-myc downstream regulated 1 (std. dev.) | 3.86                           | 9.59E-03       |

**Supplementary Figure 8. Relationship between individual protein markers and tumor uptake of FDG. A.) Univariate Analysis.** Slope represents predicted change in SUVmax per log2 unit change in corresponding biomarker metric. **B.) Multivariate analysis.**

**Supplementary Figure 9:**

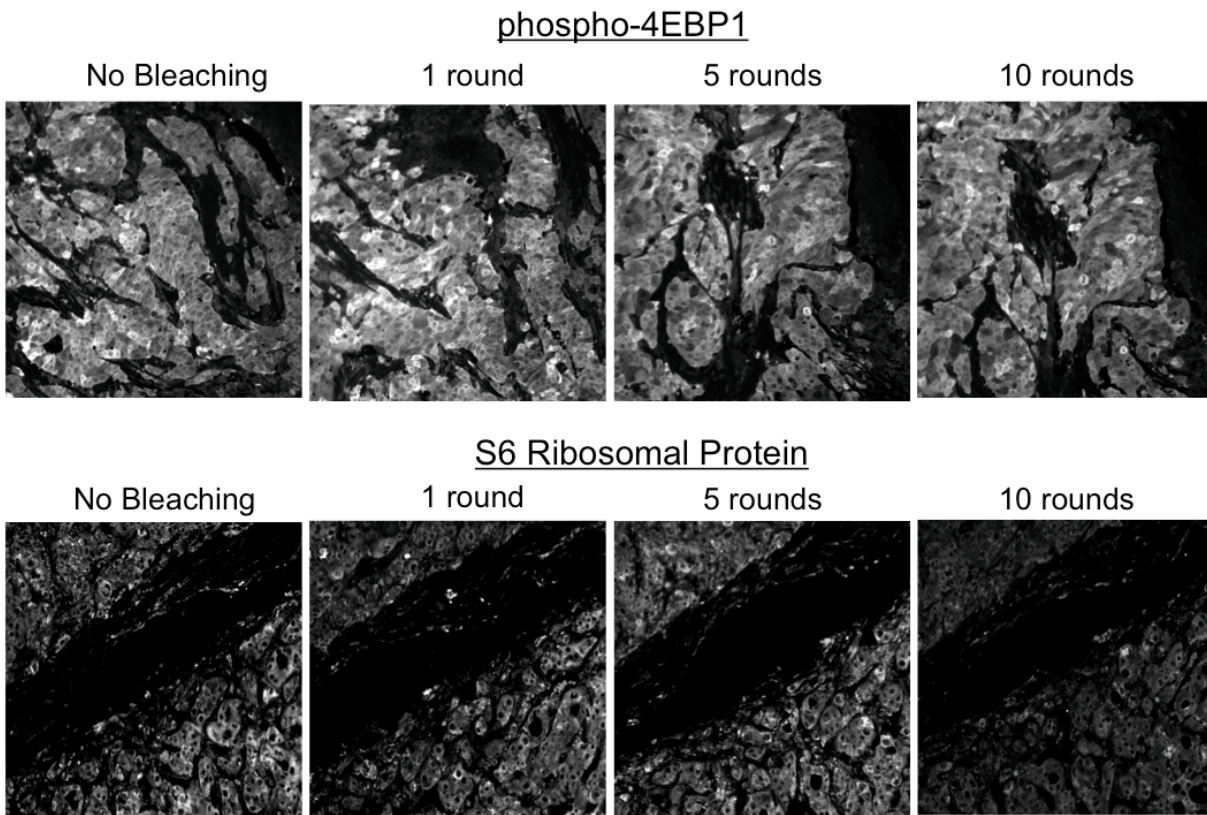

**Supplementary Figure 9:** Effect of sequential dye inactivation cycles on different protein antigens. Top tier: phospho-4EBP1 staining, bottom tier: S6 Ribosomal Protein. Please see Text for details. Magnification=20x; Zoom=2x.

**Supplementary Table 1:**

| <b>Biomarker</b>                | <b>Vendor</b>   | <b>Cat#</b>  | <b>Clone</b> |
|---------------------------------|-----------------|--------------|--------------|
| <b>AR</b>                       | Dako            | M3562        | AR441        |
| <b>4EBP1 (pT37/pT46)</b>        | Cell Signaling  | 2855B        | 236B4        |
| <b>Cadherin-pan</b>             | Neomarkers      | RB-9036      | polyclonal   |
| <b>CD31</b>                     | Cell Signaling  | 3528         | 89C2         |
| <b>cMYC</b>                     | Epitomics       | 1472         | Y69          |
| <b>Cytokeratin_pan (PCK26)*</b> | Sigma           | C1801        | PCK-26       |
| <b>Cytokeratin_pan (AE1)*</b>   | eBioscience     | 14-9001      | AE1          |
| <b>EGFR (pY1068)</b>            | Epitomics       | 1727-1       | EP774Y       |
| <b>EIF4E (pS209)</b>            | Epitomics       | 2227-x       | EP2151Y      |
| <b>ER</b>                       | Leica           | PA0151       | 6F11         |
| <b>Erk1/2 (pT202/pY204)</b>     | Cell Signaling  | 4376BF       | 20G11        |
| <b>Glut-1</b>                   | Millipore       | 07-1401      | polyclonal   |
| <b>Her2</b>                     | Cell Signaling  | 4290         | D8F12        |
| <b>Histone H3 (pS10)</b>        | Millipore       | 09-797       | polyclonal   |
| <b>HK2</b>                      | Cell Signaling  | 2867         | C64G5        |
| <b>IGF1R</b>                    | Lifespan        | LS-C82136    | 3C8B1        |
| <b>Ki67</b>                     | Thermo Fisher   | RB 1510 PABX | polyclonal   |
| <b>LDH-A</b>                    | Cell Signaling  | 3582BF       | C4B5         |
| <b>NaKATPase</b>                | Epitomics       | 2047-x       | EP1845Y      |
| <b>p53</b>                      | Dako            | M7001        | DO-7         |
| <b>PDK1 (pS241)</b>             | Abcam Epitomics | ab109460     | EPR336(2)    |
| <b>PR</b>                       | Dako            | M3568        | PgR1294      |
| <b>PTEN</b>                     | Cell Signaling  | 9188         | D4.3         |
| <b>S6</b>                       | Cell Signaling  | 2217         | 5G10         |
| <b>S6 (pS235/pS236)</b>         | Cell Signaling  | 4858B        | D57.2.2E     |
| <b>Transferrin Receptor I</b>   | Invitrogen      | 13-6800      | EPR4013      |
| <b>NDRG1</b>                    | AGI             | S0731        | H-90         |
| <b>CA9</b>                      | Thermo Fisher   | PA1-16592    | D78A4        |

**Supplementary Table 1: List of primary antibodies.** \* A cocktail of two in a 2:1 (PCK26:AE1) ratio was used to stain keratins for delineating epithelial region.

**Supplementary Table 2:**

| Patient# | Histology | Age | Sex | Tumor Size (cm) | Histologic Grade | Nuclear grade | Lymph Node Involvement |
|----------|-----------|-----|-----|-----------------|------------------|---------------|------------------------|
| 593      | IDC       | 64  | F   | 2.0             | III/III          | III/III       | YES                    |
| 613      | IDC       | 61  | F   | 2.5             | III/III          | III/III       | YES                    |
| 618      | IDC       | 57  | F   | 4.0             | III/III          | III/III       | YES                    |
| 628      | IDC       | 62  | F   | 2.5             | II/III           | II/III        | YES                    |
| 633      | IDC       | 69  | F   | 4.2             | III/III          | III/III       | YES                    |
| 638      | IDC       | 28  | F   | 1.4             | III/III          | III/III       | YES                    |
| 643      | IDC       | 44  | F   | 1.3, 1.2        | N/A              | N/A           | YES                    |
| 649      | IDC       | 29  | F   | 2.3             | II/III           | III/III       | YES                    |
| 653      | IDC       | 48  | F   | 8.5             | III/III          | III/III       | YES                    |
| 658      | IDC       | 28  | F   | 3.2             | III/III          | III/III       | NO                     |
| 663      | IDC       | 34  | F   | 2.1             | III/III          | III/III       | YES                    |
| 673      | IDC       | 46  | F   | 3.5             | III/III          | III/III       | YES                    |
| 683      | IDC       | 40  | F   | 9.5             | III/III          | III/III       | YES                    |
| 050      | IDC       | 31  | F   | N.D.            | III/III          | II/III        | YES                    |
| 057      | IDC       | 38  | F   | 2.3             | III/III          | II/III        | NO                     |
| 062      | IDC       | 46  | F   | 4               | III/III          | III/III       | NO                     |
| 116      | IDC       | 34  | F   | 1.7             | III/III          | II/III        | YES                    |
| 068      | IDC       | 51  | F   | 3.0             | III/III          | III/III       | YES                    |
| 072      | IDC       | 71  | F   | 1.2             | III/III          | II/III        | YES                    |
| 077      | IDC       | 41  | F   | 2.5             | III/III          | III/III       | YES                    |
| 083      | IDC       | 46  | F   | 3.5             | III/III          | III/III       | YES                    |
| 086      | IDC       | 42  | F   | 4.5             | II/III           | II/III        | YES                    |
| 112      | IDC       | 39  | F   | 8.0             | III/III          | III/III       | YES                    |
| 100      | IDC       | 33  | F   | 4.5             | III/III          | II/III        | YES                    |
| 095      | IDC       | 60  | F   | 1.8             | III/III          | III/III       | YES                    |
| 090      | IDC       | 64  | F   | 5.0             | III/III          | III/III       | YES                    |

**Supplementary Table 2. Breast cancer patient clinico-pathologic characteristics (n=26).** IDC, invasive ductal carcinoma; N.D. = not able to be determined; N.A. = not available. Tumor #643 had two foci.
